# Supplementary material
Source: PubMed Central journal article supplement (PMC6503467)
Supplement: jz9b00741_si_001.pdf [file jz9b00741_si_001.pdf]

# Relative Binding Energies Predict Crystallographic Binding Modes of Ethionamide Booster Lead Compounds

Natalie J. Tatum et al.

## Supplementary Charts

**Chart S1:** Chemical structures of compounds **3**, **10**, **85** and **BDM31343**.

## Supplementary Figures

**Figure S1:** Close-up of the compound **3** hydrogen bonding to EthR.

**Figure S2:** Close-up of the compound **85** hydrogen bonding to EthR.

**Figure S3:** Graphed energy (electrostatic in red, van der Waals in blue) over the course of the simulation for each compound pose in complex with EthR, per 20 ps.

**Figure S4:** Ligand poses for all four replicas clustered by pose (left, pose 1; right, pose 2), for (a) compound **3**, (b) compound **85**, (c) compound **10**, (d) **BDM31343**.

## Supplementary Tables

**Table S1:** Data collection and refinement statistics for EthR-**3** and EthR-**85**.

**Table S2:** Tabulated electrostatic contributions per residue.

**Table S3:** Tabulated van der waals contributions per residue.

**Chart S1**

| <b>Name</b>        | <b>Structure</b>                                                                     |
|--------------------|--------------------------------------------------------------------------------------|
| Compound <b>3</b>  | 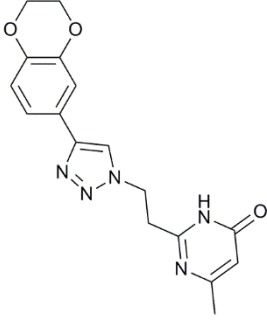    |
| Compound <b>10</b> |     |
| Compound <b>85</b> |   |
| BDM31343           |  |

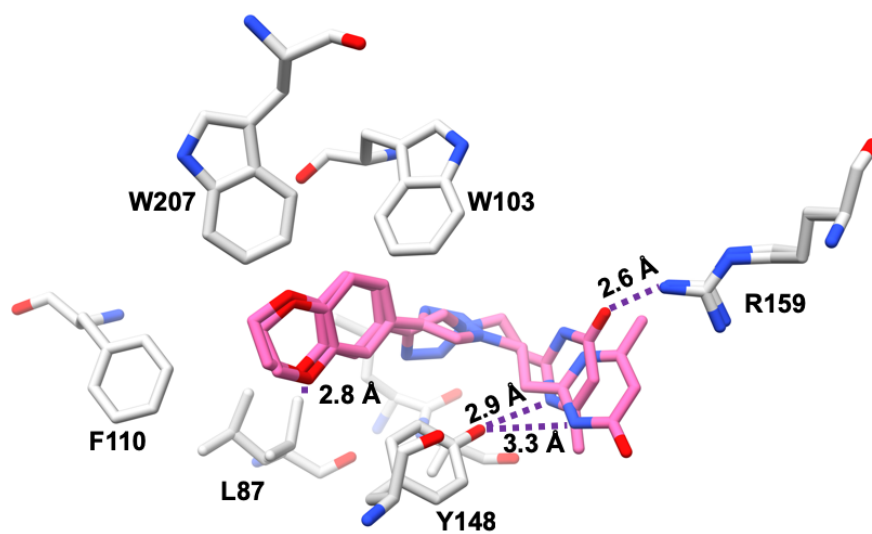

**Figure S1:** Close-up of the compound 3 hydrogen bonding to EthR.

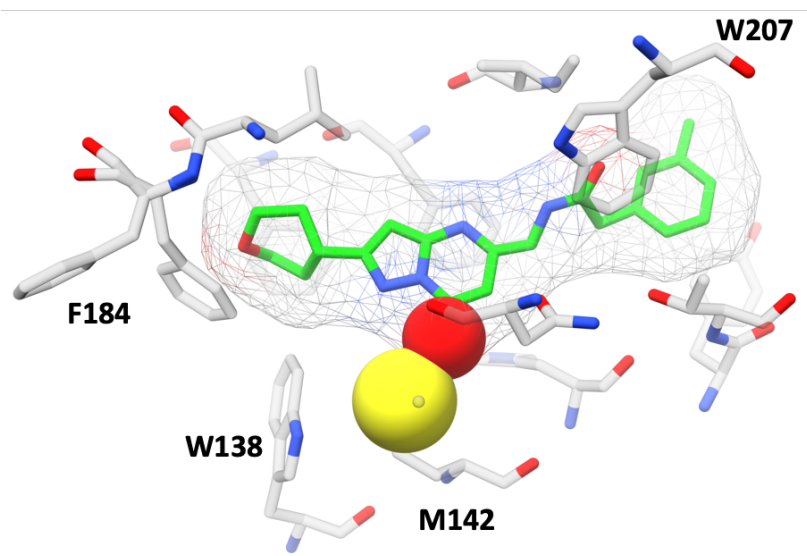

**Figure S2:** Close-up of the compound **85** hydrogen bonding to EthR. Van der Waals spheres are shown for M142 sulphur and ligand O2 shown to demonstrate overlap.

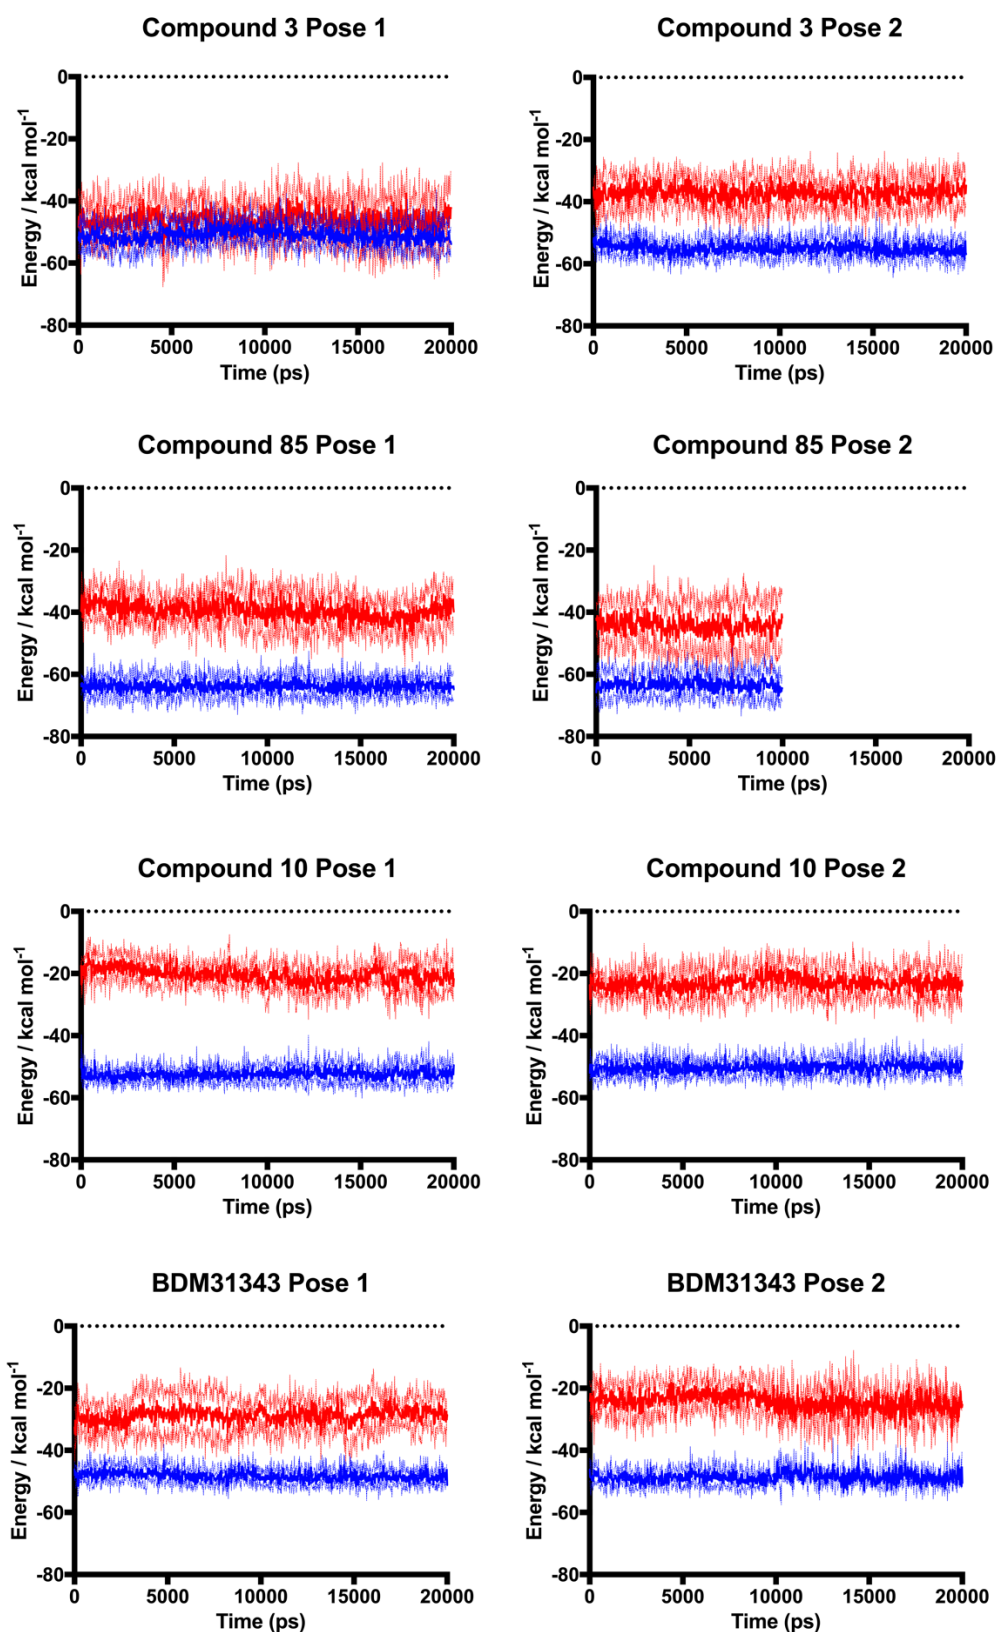

**Figure S3:** Graphed energy (electrostatic in red, van der Waals in blue) over the course of the simulation for each compound pose in complex with EthR, per 20 ps. Mean of four replicas presented as solid line with dashed line representing standard deviation from the mean. Graphs prepared in Graphpad Prism 7.

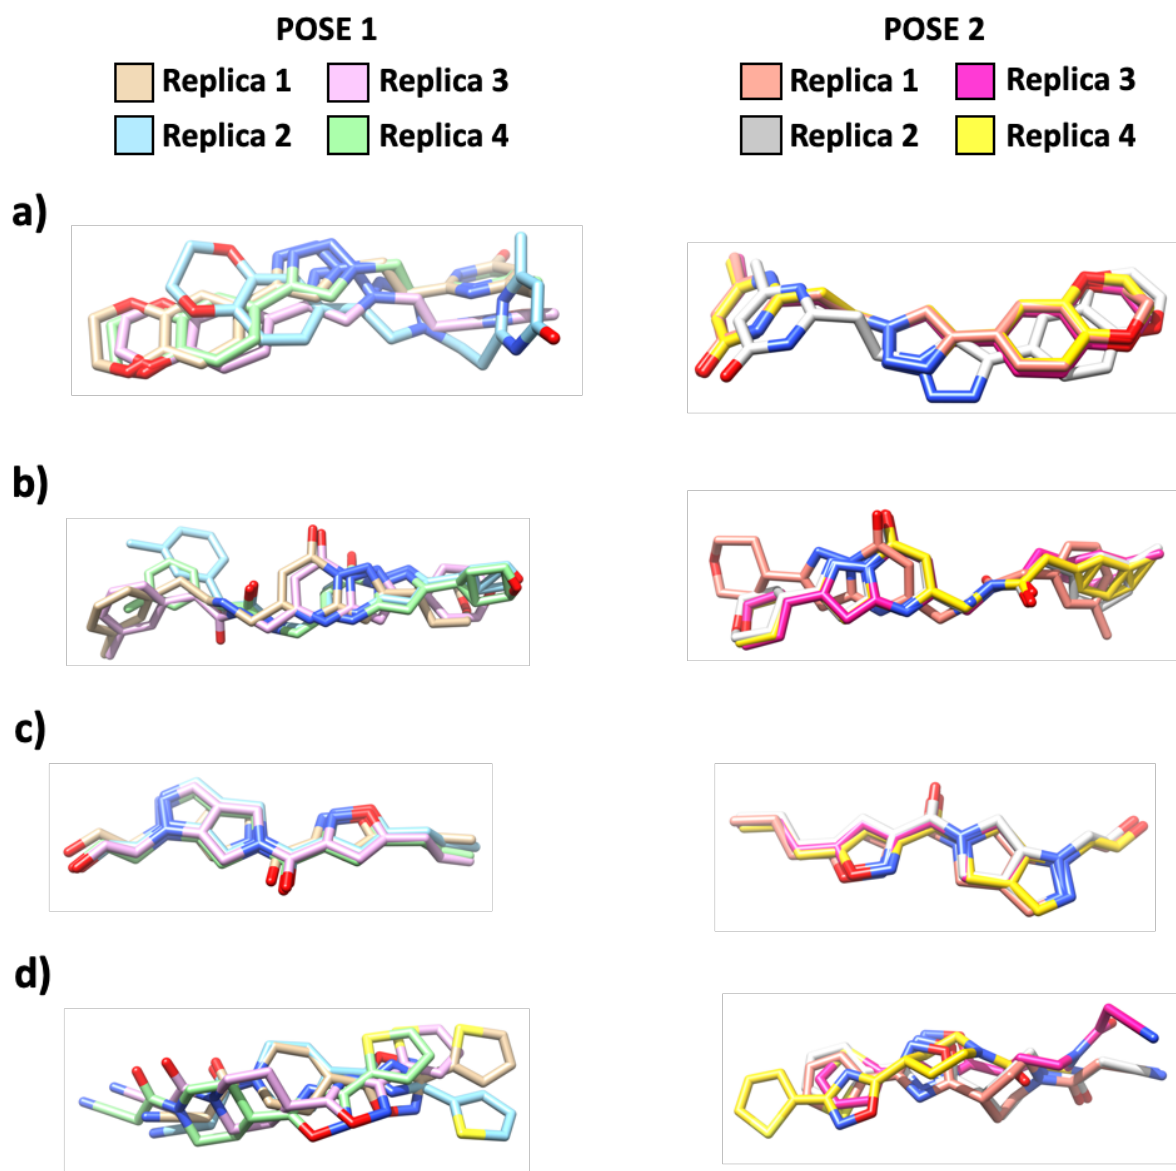

**Figure S4:** Ligand poses for all four replicas clustered by pose (left, pose 1; right, pose 2), for (a) compound 3, (b) compound 85, (c) compound 10, (d) BDM31343.

**Table S1:** Data collection and refinement statistics for EthR-3 and EthR-85.

| Structure                   | <b>3</b>                         | <b>85</b>                        |
|-----------------------------|----------------------------------|----------------------------------|
| DLS Beamline                | I03                              | I04-1                            |
| Wavelength [Å]              | 0.96000                          | 0.91741                          |
| a, b [Å]                    | 121.76                           | 120.89                           |
| c [Å]                       | 33.63                            | 33.68                            |
| $\alpha=\beta=\gamma$ [°]   | 90                               | 90                               |
| Space group                 | P4 <sub>1</sub> 2 <sub>1</sub> 2 | P4 <sub>1</sub> 2 <sub>1</sub> 2 |
| Resolution range            | 86.10-1.80                       | 85.48-1.80                       |
| No. of refl.                | 44875                            | 43521                            |
| Multiplicity                | 7.09                             | 7.12                             |
| Wilson B [Å <sup>2</sup> ]  | 32.1                             | 36.0                             |
| I/sigma <sup>#</sup>        | 21.3 (4.2)                       | 14.9 (3.1)                       |
| Rmerge [%]*                 | 6.0 (52.8)                       | 7.2 (61.3)                       |
| Completeness [%]*           | 99.6 (98.1)                      | 98.4 (95.8)                      |
| Rwork [%]                   | 18.42                            | 20.53                            |
| Rfree [%]                   | 21.39                            | 25.68                            |
| No of residues              | 193                              | 192                              |
| No of water                 | 69                               | 25                               |
| Protein B [Å <sup>2</sup> ] | 32.80                            | 35.34                            |
| Ligand B [Å <sup>2</sup> ]  | 72.64                            | 60.70                            |
| Water [Å <sup>2</sup> ]     | 37.75                            | 37.39                            |
| Rmsd bond lengths [Å]       | 0.0142                           | 0.0716                           |
| Rmsd angles [°]             | 1.7263                           | 1.5975                           |
| Ramach. Ouliers             | 2 (1.11%)                        | 2 (1.08%)                        |
| PDB code                    |                                  |                                  |

\* calculated by XDS, Friedel pairs not merged

# numbers in brackets refer to last shell

**Table S2:** Tabulated electrostatic contributions per residue. Where no interactions/contacts are made, values are not given. Graphed as figure 3.

|     |     | Compound 85 |          |          |          | BDM31343 |          |          |          | Compound 10 (Pose A) |          |          |          | Compound 10 (Pose B) |          |          |          | Compound 3 |          |          |          |  |
|-----|-----|-------------|----------|----------|----------|----------|----------|----------|----------|----------------------|----------|----------|----------|----------------------|----------|----------|----------|------------|----------|----------|----------|--|
|     |     | REPLICA1    | REPLICA2 | REPLICA3 | REPLICA4 | REPLICA1 | REPLICA2 | REPLICA3 | REPLICA4 | REPLICA1             | REPLICA2 | REPLICA3 | REPLICA4 | REPLICA1             | REPLICA2 | REPLICA3 | REPLICA4 | REPLICA1   | REPLICA2 | REPLICA3 | REPLICA4 |  |
| Asp | 84  | 1.94        | 2.16     | 2.14     | 2.14     |          |          |          |          |                      |          |          |          |                      |          |          |          |            |          |          |          |  |
| Leu | 87  | -0.30       | -0.34    | -0.36    | -0.31    | -0.01    | 0.14     | 0.17     | 0.09     | -0.19                | -0.21    | -0.24    | -0.23    | 0.00                 | 0.00     | -0.01    | 0.00     | -0.34      | -0.34    | -0.37    | -0.30    |  |
| Leu | 90  | 0.15        | 0.11     | 0.18     | 0.15     | -0.15    | -0.29    | -0.12    | -0.02    | -0.03                |          | -0.08    | -0.14    |                      |          |          |          | 0.61       | -0.14    | 0.18     | -0.41    |  |
| Ala | 91  | -0.02       | -0.02    | 0.02     | -0.03    |          |          |          |          | -0.01                |          | -0.05    | -0.09    |                      |          |          |          | -0.07      | 0.16     | -0.03    | 0.00     |  |
| Pro | 94  |             |          |          |          |          |          |          |          |                      |          |          |          |                      |          |          |          | -1.21      | 0.05     | -0.51    | -0.70    |  |
| Ala | 95  |             |          |          |          |          |          |          |          |                      |          |          |          |                      |          |          |          | -1.06      | -0.08    | -0.51    | -0.52    |  |
| Glu | 100 |             |          |          |          |          | -0.05    | -0.09    | -0.01    |                      |          |          |          |                      |          |          |          |            |          |          |          |  |
| Met | 102 | -0.02       | 0.03     | -0.17    | -0.06    | 0.14     | 0.22     | -0.29    | -0.25    | 0.09                 | 0.17     | 0.15     | 0.13     |                      |          |          |          | 1.15       | -0.30    | 0.19     | 0.32     |  |
| Trp | 103 | -0.80       | -0.59    | -0.67    | -0.71    | 0.07     | 0.36     | 0.13     | -0.21    | -0.14                | -0.19    | -0.21    | -0.21    | 0.03                 | -0.07    | 0.04     | 0.11     | -0.8       | 0.23     | 0.18     | 0.19     |  |
| Arg | 104 |             |          |          |          |          |          |          |          |                      |          |          |          | -0.29                | -0.29    | -0.30    | -0.30    |            |          |          |          |  |
| Thr | 105 |             |          |          |          |          |          |          |          |                      |          |          |          |                      |          |          |          | -0.7       | -0.09    | -0.26    | -0.42    |  |
| Gly | 106 | 0.92        | 0.15     | 1.12     | 1.07     | -0.46    | -0.85    | -0.15    | 0.15     | -0.79                | -0.87    | -0.85    | -0.83    | -0.51                | -0.51    | -0.52    | -0.52    | -1.45      | -1.01    | -1.1     | -1.26    |  |
| Ile | 107 | 0.18        | -0.06    | 0.23     | 0.32     | 0.36     | 0.40     | 0.02     | 0.00     | 0.12                 | 0.21     | 0.19     | 0.19     | -0.13                | -0.25    | -0.25    | -0.26    | -0.27      | -0.02    | -0.26    | -0.26    |  |
| Phe | 110 | -0.50       | 0.34     | -0.10    | -0.30    | -1.56    | -1.56    | -1.03    | -0.72    | -0.15                | -0.27    | -0.17    | -0.01    | -0.95                | -0.59    | -0.65    | -0.78    | -0.39      | 0.04     | -0.72    | -0.54    |  |
| Phe | 114 | -0.12       | -0.09    | -0.13    | -0.13    |          |          |          |          |                      |          |          |          | -0.37                | -0.34    | -0.32    | -0.32    |            |          |          |          |  |
| Trp | 138 | -0.15       | -0.41    | -0.22    | -0.13    |          |          |          |          | -0.16                | -0.41    | -0.39    | -0.19    | 0.19                 | 0.10     | 0.13     | 0.16     |            |          |          |          |  |
| Met | 142 | -0.10       | 0.33     | 0.13     | -0.16    | -1.61    | -1.21    | -0.23    | -0.63    | 0.14                 |          | -1.19    | -1.51    | -0.07                | 0.09     | -0.04    | 0.25     |            |          |          |          |  |
| Lys | 144 | -1.39       | -1.64    | -1.77    | -2.03    |          | 0.75     | 1.46     | 1.33     |                      |          |          |          | 0.23                 | 0.24     | 0.25     | 0.25     |            |          |          |          |  |
| Trp | 145 | 1.21        | 1.22     | 1.05     | 1.10     | 0.19     | -0.24    | 0.01     | 0.51     | 0.11                 | 0.91     | 0.78     | 0.91     | 0.16                 | 0.10     | 0.06     | 0.06     | -0.22      | -0.01    | -0.18    | -0.13    |  |
| Tyr | 148 | -1.29       | -1.5     | -1.44    | -1.43    | -0.22    | 0.23     | -0.47    | -0.71    | -0.89                | -1.37    | -1.24    | -1.47    | -0.15                | -0.25    | -0.27    | -0.16    | -0.87      | -1.33    | -1.22    | -1.01    |  |
| Thr | 149 | -1.70       | -1.45    | -1.79    | -1.72    | -0.86    | -0.52    | -0.65    | -1.02    | -0.54                | -1.65    | -1.63    | -1.75    | -0.21                | -0.26    | -0.2     | -0.21    | 0.33       | 0.39     | 0.24     | 0.21     |  |
| Val | 152 | -0.08       | -0.1     | -0.07    | -0.05    | -0.08    | -0.04    | -0.10    |          | 0.13                 | 0.09     | 0.07     | 0.04     |                      |          |          |          | 0.04       | 0.21     | 0.20     | 0.11     |  |
| Asn | 176 | -4.17       | -3.35    | -4.44    | -4.22    | -1.58    | -1.33    | 0.27     | -1.08    | -0.92                | -1.56    | -1.85    | -1.61    | 0.24                 | 0.02     | -0.14    | -0.83    | -2.18      | -0.15    | -1.9     | -0.36    |  |
| Asn | 179 | -4.29       | -4.61    | -2.85    | -3.50    | -1.91    | -1.37    | -3.95    | -3.34    | 0.49                 | 0.17     | 0.37     | 0.63     | -1.94                | -4.75    | -4.42    | -2.85    | 0.81       | -0.32    | 0.22     | 0.60     |  |
| Glu | 180 | -0.02       | -0.17    | -0.11    | -0.08    | 0.16     | 0.20     | 0.10     | 0.69     | -0.07                | 0.02     | 0.15     | 0.20     | -1.78                | -0.15    | -0.38    | -0.30    |            |          |          |          |  |
| Leu | 183 | -0.08       | -0.12    | -0.07    | -0.06    |          |          |          |          | -0.05                | -0.09    | -0.08    | -0.07    | 0.07                 | 0.14     | 0.12     | 0.08     |            |          |          |          |  |
| Phe | 184 |             |          |          |          |          |          |          |          |                      |          |          |          | 0.07                 | 0.07     | 0.09     | 0.08     |            |          |          |          |  |
| Phe | 187 |             |          |          |          |          |          |          |          |                      |          |          |          | 0.12                 | 0.11     | 0.11     | 0.10     |            |          |          |          |  |
| Trp | 207 | -0.39       | -0.06    | -0.29    | -0.21    | -0.11    | -0.18    | -0.07    | 0.07     | -0.03                | -0.04    | -0.02    | -0.04    | -0.10                | -0.16    | -0.13    | -0.13    | 0.14       | -0.39    | -0.01    | 0.09     |  |



**Table S3:** Tabulated van der waals contributions per residue. Where no interactions/contacts are made, values are not given. Graphed as figure 3.

|     |     | Compound 85 |           |           |           | BDM31343  |           |           |           | Compound 10 (Pose A) |           |           |           | Compound 10 (Pose B) |           |           |           | Compound 3 |           |           |           |  |
|-----|-----|-------------|-----------|-----------|-----------|-----------|-----------|-----------|-----------|----------------------|-----------|-----------|-----------|----------------------|-----------|-----------|-----------|------------|-----------|-----------|-----------|--|
|     |     | REPLICA 1   | REPLICA 2 | REPLICA 3 | REPLICA 4 | REPLICA 1 | REPLICA 2 | REPLICA 3 | REPLICA 4 | REPLICA 1            | REPLICA 2 | REPLICA 3 | REPLICA 4 | REPLICA 1            | REPLICA 2 | REPLICA 3 | REPLICA 4 | REPLICA 1  | REPLICA 2 | REPLICA 3 | REPLICA 4 |  |
| Asp | 84  | -0.14       | -0.18     | -0.16     | -0.15     |           |           |           |           |                      |           |           |           |                      |           |           |           |            |           |           |           |  |
| Leu | 87  | -3.48       | -4.39     | -4.16     | -3.71     | -2.59     | -3.16     | -3.29     | -3.03     | -3.07                | -3.06     | -3.27     | -3.28     | -2.16                | -2.03     | -2.08     | -2.29     | -3.16      | -2.29     | -3.38     | -3.15     |  |
| Leu | 90  | -1.90       | -2.04     | -2.03     | -1.74     | -1.29     | -2.38     | -0.98     | -0.32     | -0.57                |           | -1.10     | -1.45     |                      |           |           |           | -3.64      | -3.99     | -4.38     | -3.87     |  |
| Ala | 91  | -1.15       | -1.05     | -1.19     | -1.26     |           |           |           |           | -0.19                |           | -0.74     | -1.02     |                      |           |           |           | -2.93      | -1.64     | -2.14     | -2.22     |  |
| Pro | 94  |             |           |           |           |           |           |           |           |                      |           |           |           |                      |           |           |           | -1.66      | -0.40     | -1.5      | -1.37     |  |
| Ala | 95  |             |           |           |           |           |           |           |           |                      |           |           |           |                      |           |           |           | -0.47      | -0.19     | -1.5      | -0.52     |  |
| Glu | 100 |             |           |           |           |           | -1.42     | -1.12     | -0.16     |                      |           |           |           |                      |           |           |           |            |           |           |           |  |
| Met | 102 | -1.90       | -1.63     | -2.15     | -1.95     | -1.96     | -0.79     | -1.37     | -0.87     | -1.58                | -1.89     | -2.11     | -2.09     |                      |           |           |           | -4.07      | -3.6      | -3.91     | -4.04     |  |
| Trp | 103 | -3.85       | -3.24     | -3.54     | -3.83     | -4.02     | -2.97     | -4.77     | -3.17     | -3.82                | -4.28     | -4.13     | -4.09     | -1.68                | -1.45     | -1.66     | -1.78     | -4.87      | -4.38     | -4.47     | -5.35     |  |
| Arg | 104 |             |           |           |           |           |           |           |           |                      |           |           |           | -0.13                | -0.12     | -0.13     | -0.13     |            |           |           |           |  |
| Thr | 105 |             |           |           |           |           |           |           |           |                      |           |           |           |                      |           |           |           | -1.49      | -0.4      | -0.45     | -0.56     |  |
| Gly | 106 | -2.49       | -2.01     | -2.05     | -2.08     | -2.55     | -2.13     | -1.10     | -1.25     | -2.42                | -2.18     | -2.17     | -2.15     | -1.68                | -1.47     | -1.39     | -1.86     | -2.14      | -1.92     | -1.87     | -2.23     |  |
| Ile | 107 | -1.58       | -0.68     | -1.88     | -1.79     | -2.84     | -2.87     | -1.04     | -1.47     | -3.54                | -3.38     | -3.36     | -3.05     | -3.14                | -2.84     | -3.16     | -2.82     | -1.41      | -1.52     | -2.49     | -2.74     |  |
| Phe | 110 | -7.81       | -5.46     | -7.26     | -7.63     | -5.40     | -5.30     | -3.47     | -3.53     | -6.02                | -5.87     | -5.89     | -5.55     | -6.86                | -7.31     | -7.26     | -7.10     | -1.60      | -0.79     | -2.23     | -2.34     |  |
| Phe | 114 | -2.88       | -2.43     | -2.52     | -2.80     |           |           |           |           |                      |           |           |           | -2.92                | -2.99     | -3.04     | -2.92     |            |           |           |           |  |
| Trp | 138 | -1.62       | -2.57     | -1.72     | -1.56     |           |           |           |           | -0.71                | -0.27     | -0.30     | -0.32     | -1.37                | -1.22     | -1.30     | -1.30     |            |           |           |           |  |
| Met | 142 | -1.63       | -2.49     | -1.70     | -1.60     | -1.29     | -0.96     | -0.50     | -1.30     | -0.43                |           | -0.90     | -0.78     | -0.43                | -0.85     | -0.61     | -1.41     |            |           |           |           |  |
| Lys | 144 | -0.19       | -0.25     | -0.22     | -0.24     |           | -0.14     | -0.19     | -0.20     |                      |           |           |           | -0.20                | -0.18     | -0.19     | -0.21     |            |           |           |           |  |
| Trp | 145 | -3.85       | -5.18     | -4.07     | -4.10     | -3.47     | -3.31     | -4.69     | -4.79     | -3.58                | -4.14     | -4.12     | -4.25     | -4.97                | -4.69     | -4.9      | -4.95     | -2.65      | -0.47     | -2.02     | -1.20     |  |
| Tyr | 148 | -1.07       | -2.99     | -2.66     | -2.16     | -2.12     | -2.11     | -2.17     | -2.47     | -2.65                | -2.94     | -2.52     | -2.51     | -2.01                | -1.9      | -1.92     | -2.03     | -3.08      | -3.76     | -4.05     | -3.30     |  |
| Thr | 149 | -2.10       | -2.37     | -2.10     | -2.21     | -2.3      | -2.47     | -2.33     | -1.96     | -1.82                | -2.13     | -2.14     | -2.24     | -1.86                | -2.04     | -1.95     | -2.20     | -1.87      | -1.80     | -1.85     | -1.49     |  |
| Val | 152 | -1.71       | -1.40     | -1.55     | -1.60     | -1.94     | -2.21     | -1.32     |           | -1.27                | -1.40     | -1.44     | -1.50     |                      |           |           |           | -3.30      | -5.33     | -2.74     | -3.00     |  |
| Asn | 176 | -3.27       | -3.96     | -3.06     | -2.84     | -1.97     | -1.95     | -2.90     | -3.35     | -2.16                | -3.15     | -3.27     | -3.38     | -0.90                | -3.17     | -2.84     | -3.27     | -1.56      | -1.21     | -1.21     | -0.66     |  |

|            |            |       |       |       |       |       |       |       |       |       |       |       |       |       |       |       |       |       |       |       |       |
|------------|------------|-------|-------|-------|-------|-------|-------|-------|-------|-------|-------|-------|-------|-------|-------|-------|-------|-------|-------|-------|-------|
| <b>Asn</b> | <b>179</b> | -1.02 | -1.12 | -2.13 | -1.45 | -0.95 | -1.17 | -0.46 | -1.43 | -3.05 | -2.13 | -2.36 | -2.37 | -1.20 | -1.76 | -1.71 | -1.08 | -0.96 | -0.83 | -1.11 | -1.25 |
| <b>Glu</b> | <b>180</b> | -4.01 | -4.07 | -4.11 | -4.08 | -1.05 | -0.49 | -2.29 | -2.72 | -1.72 | -1.63 | -1.56 | -1.37 | -3.19 | -3.29 | -3.42 | -3.17 |       |       |       |       |
| <b>Leu</b> | <b>183</b> | -1.98 | -0.96 | -1.89 | -2.00 |       |       |       |       | -1.26 | -0.75 | -0.68 | -0.36 | -2.29 | -2.10 | -2.03 | -2.03 |       |       |       |       |
| <b>Phe</b> | <b>184</b> |       |       |       |       |       |       |       |       |       |       |       |       | -1.02 | -0.97 | -0.91 | -0.82 |       |       |       |       |
| <b>Phe</b> | <b>187</b> |       |       |       |       |       |       |       |       |       |       |       |       | -1.00 | -0.85 | -0.82 | -0.79 |       |       |       |       |
| <b>Trp</b> | <b>207</b> | -2.55 | -2.46 | -2.87 | -2.81 | -2.21 | -2.09 | -2.01 | -2.50 | -3.14 | -3.30 | -3.35 | -3.33 | -1.97 | -2.55 | -2.51 | -2.04 | -3.40 | -2.26 | -2.27 | -2.50 |
